# Supplementary material for: Hindcasting estuary ecological states using sediment cores, modelled historic nutrient loads, and a Bayesian network
Source: Frontiers journal article supplement (doi:10.3389/fmars.2024.1374869), 2024-03-21
Supplement: Data_Sheet_2.XLSX [file Data_Sheet_2.XLSX]

## Sheet: Sediment data
Core	Depth	Year	PotN	N_load	N_pc	mud_pc	Chl-a	Phaeo	Preservation index	C_pc	d13C	d15N	Suess_d13C	C.N.massrat	C.N.molrat	OM content	Chr	Fe	Mn	Mo	Ni	V	Zn
Central	0.5	2019	660.18	5143.68	0.36	100	57.1	34.6	1.7	3.12	-25.77	10.91	-23.38	8.61331	10.0489	8.2	36	37000	510	0.61	33	70	137
Central	5.5	2017	665.807	5312.9	0.27	NA	NA	NA	NA	2.52	-26.22	9.07	-23.93	9.27914	10.8257	NA	NA	NA	NA	NA	NA	NA	NA
Central	10.5	2016	652.488	5379.34	0.28	NA	NA	NA	NA	2.62	-26.17	8.91	-23.93	9.42101	10.9912	NA	NA	NA	NA	NA	NA	NA	NA
Central	20.5	2013	595.057	5234.76	0.25	100	7.9	11.9	0.7	2.45	-26.53	8.51	-24.38	9.78384	11.4145	5.6	37	33000	350	1.37	33	73	138
Central	25.5	2011	594.123	5483.89	0.25	NA	NA	NA	NA	2.5	-26.73	8.1	-24.68	9.85803	11.501	NA	NA	NA	NA	NA	NA	NA	NA
Central	30.5	2010	571.189	4749.74	0.25	NA	NA	NA	NA	2.49	-26.72	8.14	-24.72	10.104	11.788	NA	NA	NA	NA	NA	NA	NA	NA
Central	35.5	2008	518.966	4373.28	0.22	NA	NA	NA	NA	2.22	-26.81	7.62	-24.85	10.0173	11.6869	NA	NA	NA	NA	NA	NA	NA	NA
Central	40.5	2006	461.571	3744.82	0.2	100	2.8	5.9	0.5	2.12	-27.01	7.21	-25.09	10.594	12.3597	5.1	34	31000	350	1.25	30	70	128
Central	43.5	1998	417.367	3201.49	0.18	100	1.7	6.3	0.3	1.95	-27.09	6.77	-25.38	10.9442	12.7682	4.2	34	32000	360	1.15	31	69	119
Central	45.5	1993	414.785	3179.35	0.17	100	1.4	5.1	0.3	1.85	-27.29	6.32	-25.76	11.1383	12.9947	3.6	34	32000	350	1.06	33	69	118
Central	48.5	1985	409.264	3132.4	0.12	100	2.7	5.9	0.5	1.31	-27.28	5.98	-25.93	10.7851	12.5826	3.5	35	30000	370	0.87	34	68	109
Central	50.5	1980	405.543	3100.91	0.17	100	1.3	6.5	0.2	1.82	-26.98	6.53	-25.78	10.6317	12.4036	3.3	34	31000	370	1	30	68	111
Central	55.5	1966	335.117	2535.25	0.15	61.12	0.9	5.8	0.2	1.61	-27.09	5.84	-26.16	10.9901	12.8218	2.9	31	27000	320	0.95	27	61	105
Central	60.5	1953	259.218	1856.84	0.12	100	0.8	6.1	0.1	1.31	-26	6.43	-25.27	10.6566	12.4326	2.5	29	28000	310	1.42	27	60	99
Central	64.5	1943	246.595	1727.84	0.07	29.58	1.3	4.8	0.3	0.74	-26.3	5.94	-25.74	10.695	12.4775	2.2	26	24000	270	1.17	23	51	80
Central	69.5	1929	222.261	1497.74	NA	100	1.3	2.4	0.5	NA	NA	NA	NA	NA	NA	1.6	23	20000	250	0.92	20	46	56
Central	70.5	1927	219.102	1469.69	0.07	NA	NA	NA	NA	0.71	-25.83	6.36	-25.42	10.7174	12.5037	NA	NA	NA	NA	NA	NA	NA	NA
Central	74.5	1916	205.669	1343.84	0.06	33.32	1.5	2.4	0.6	0.57	-25.98	6.13	-25.65	10.2085	11.9099	1.4	18.6	18300	240	0.98	15.7	38	47
Central	80.5	1900	195.416	1249.09	0.04	NA	NA	NA	NA	0.39	-25.71	6.42	-25.47	10.8569	12.6664	NA	NA	NA	NA	NA	NA	NA	NA
Central	90.5	1874	179.959	1116.89	0.01	NA	NA	NA	NA	0.16	-25.85	6.1	-25.71	15.9839	18.6479	NA	NA	NA	NA	NA	NA	NA	NA
Upper	0.5	2019	660.18	5143.68	0.34	87.84	NA	NA	NA	2.95	-26.06	9.53	-23.67	8.6492	10.0907	NA	35	35000	700	0.72	32	71	144
Upper	1.5	2018	NA	NA	NA	NA	56.1	31.7	1.8	NA	NA	NA	NA	NA	NA	6.7	NA	NA	NA	NA	NA	NA	NA
Upper	5.5	2016	652.488	5379.34	0.31	100	12.5	18.9	0.7	2.8	-26.27	8.45	-24.13	9.19082	10.7226	5.7	36	36000	390	0.8	33	73	142
Upper	10.5	2013	595.057	5234.76	0.29	100	5.9	9.7	0.6	2.77	-26.4	8.07	-24.48	9.43287	11.005	5.6	36	34000	360	1.02	33	71	142
Upper	15.5	2009	551.262	NA	NA	100	4.4	10.5	0.4	NA	NA	NA		NA	NA	5.8	35	35000	410	1.07	32	70	139
Upper	20.5	2007	479.708	4089.63	0.24	100	3	6.9	0.4	2.39	-26.73	7.82	-25.21	9.7711	11.3996	5.2	35	32000	360	0.86	31	67	136
Upper	25.5	2004	445.604	3461.92	0.23	100	4.4	7.6	0.6	2.25	-26.85	7.73	-25.5	9.95737	11.6169	5.2	36	33000	370	1.35	33	69	139
Upper	30.5	2001	419.248	3128.56	0.21	100	1.7	4.1	0.4	2.13	-27.01	7.34	-25.78	10.2128	11.9149	4.6	35	37000	360	1.21	33	72	139
Upper	35.5	1998	417.367	3201.49	0.21	NA	NA	NA	NA	2.13	-27.19	6.99	-26.1	10.429	12.1672	NA	NA	NA	NA	NA	NA	NA	NA
Upper	40.5	1995	415.866	3188.84	0.18	100	1.6	4.4	0.4	1.89	-27.07	6.89	-26.11	10.7753	12.5712	4.2	37	34000	380	1.02	34	74	137
Upper	50.5	1989	412.215	3158.56	0.14	100	1.2	5.8	0.2	1.54	-27.04	6	-26.3	10.8683	12.6796	3.4	35	31000	360	0.85	32	69	124
Upper	60.5	1983	407.83	3119.81	0.13		NA	NA	NA	1.49	-27.23	5.62	-26.64	11.0837	12.9309	NA	NA	NA	NA	NA	NA	NA	NA
Upper	62.5	1966	335.117	NA	NA	43.28	1.3	4.3	0.3	NA	NA	NA	NA	NA	NA	2.6	27	25000	310	0.78	25	56	100
Upper	70.5	1934	228.792	1533.26	0.08		NA	NA	NA	0.84	-26.13	6.42	-25.67	10.2157	11.9184	NA	NA	NA	NA	NA	NA	NA	NA
Upper	72.5	1925	216.01	NA	NA	13.43	0.8	2.8	0.3	NA	NA	NA	NA	NA	NA	1.4	21	18400	250	0.64	19.5	43	65
Upper	80.5	1892	190.352	1208.79	0.07		NA	NA	NA	0.77	-25.67	5.58	-25.31	10.7858	12.5834	NA	NA	NA	NA	NA	NA	NA	NA
Upper	83.5	1880	183.283	NA	NA	7.61	0.5	1.8	0.3	NA	NA	NA	NA	NA	NA	1.1	19.6	17700	230	0.62	16.5	43	42
Upper	90.5	1847	163.376	967.272	0.03		NA	NA	NA	0.32	-24.75	5.63	-24.47	9.51963	11.1062	NA	NA	NA	NA	NA	NA	NA	NA

## Sheet: Land-use inputs modelled
Year	TotN	PotN	Type
1840	974.24	170.974	CLUES
1841	984.614	172.239	Interpolated
1842	985.312	172.325	Interpolated
1843	986.019	172.411	Interpolated
1844	986.733	172.498	Interpolated
1845	987.455	172.586	Interpolated
1846	988.185	172.675	Interpolated
1847	988.924	172.765	Interpolated
1848	989.672	172.856	Interpolated
1849	990.428	172.949	Interpolated
1850	991.194	173.042	Interpolated
1851	991.969	173.137	Interpolated
1852	992.753	173.232	Interpolated
1853	993.547	173.329	Interpolated
1854	994.35	173.427	Interpolated
1855	995.164	173.526	Interpolated
1856	995.988	173.627	Interpolated
1857	996.822	173.729	Interpolated
1858	997.668	173.832	Interpolated
1859	998.524	173.936	Interpolated
1860	999.391	174.042	Interpolated
1861	1000.27	174.149	Interpolated
1862	1009.63	175.291	Interpolated
1863	1019.07	176.443	Interpolated
1864	1028.61	177.607	Interpolated
1865	1038.24	178.782	Interpolated
1866	1047.97	179.968	Interpolated
1867	1057.79	181.167	Interpolated
1868	1067.71	182.377	Interpolated
1869	1077.73	183.599	Interpolated
1870	1087.85	184.833	Interpolated
1871	1098.06	186.079	Interpolated
1872	1101.96	186.555	Interpolated
1873	1105.89	187.034	Interpolated
1874	1109.84	187.516	Interpolated
1875	1113.82	188.001	Interpolated
1876	1117.82	188.489	Interpolated
1877	1121.85	188.981	Interpolated
1878	1125.9	189.475	Interpolated
1879	1129.99	189.973	Interpolated
1880	1134.09	190.474	Interpolated
1881	1138.23	190.979	Interpolated
1882	1142.39	191.487	Interpolated
1883	1146.59	191.998	Interpolated
1884	1150.81	192.513	Interpolated
1885	1155.06	193.032	Interpolated
1886	1159.34	193.554	Interpolated
1887	1163.65	194.08	Interpolated
1888	1167.99	194.61	Interpolated
1889	1172.37	195.143	Interpolated
1890	1176.77	195.68	Interpolated
1891	1178.27	195.863	Interpolated
1892	1185.68	196.767	Interpolated
1893	1190.18	197.316	Interpolated
1894	1194.72	197.87	Interpolated
1895	1199.29	198.427	Interpolated
1896	1202.99	198.879	Interpolated
1897	1208.54	199.555	Interpolated
1898	1213.21	200.126	Interpolated
1899	1217.93	200.701	Interpolated
1900	1222.68	201.281	Interpolated
1901	1223.13	201.335	Interpolated
1902	1230.99	202.295	Interpolated
1903	1235.2	202.808	Interpolated
1904	1239.45	203.326	Interpolated
1905	1243.73	203.849	Interpolated
1906	1247.19	204.271	Interpolated
1907	1252.41	204.908	Interpolated
1908	1256.81	205.444	Interpolated
1909	1261.79	206.052	Interpolated
1910	1266.82	206.666	Interpolated
1911	1264.96	206.438	Interpolated
1912	1277.01	207.909	Interpolated
1913	1282.18	208.539	Interpolated
1914	1287.39	209.174	Interpolated
1915	1292.64	209.816	Interpolated
1916	1298.4	210.517	Interpolated
1917	1303.3	211.116	Interpolated
1918	1308.71	211.775	Interpolated
1919	1314.16	212.441	Interpolated
1920	1319.67	213.113	Interpolated
1921	1327.14	214.024	Interpolated
1922	1340.51	215.654	Interpolated
1923	1351.08	216.944	Interpolated
1924	1361.75	218.246	Interpolated
1925	1372.53	219.561	Interpolated
1926	1394.89	222.289	Interpolated
1927	1394.41	222.229	Interpolated
1928	1405.51	223.584	Interpolated
1929	1416.72	224.951	Interpolated
1930	1428.04	226.333	Interpolated
1931	1434.63	227.136	Interpolated
1932	1445.53	228.466	Interpolated
1933	1454.4	229.549	Interpolated
1934	1463.36	230.641	Interpolated
1935	1492.05	234.141	CLUES
1936	1488.29	233.682	Interpolated
1937	1490.77	233.985	Interpolated
1938	1500.09	235.121	Interpolated
1939	1509.5	236.269	Interpolated
1940	1519	237.429	Interpolated
1941	1541.49	240.172	Interpolated
1942	1564.32	242.958	Interpolated
1943	1587.5	245.785	Interpolated
1944	1611.03	248.655	Interpolated
1945	1623.72	250.204	Interpolated
1946	1622.03	249.997	Interpolated
1947	1609.4	248.456	Interpolated
1948	1597.02	246.946	Interpolated
1949	1584.89	245.466	Interpolated
1950	1573.01	244.017	Interpolated
1951	1595.61	246.775	Interpolated
1952	1642.91	252.545	Interpolated
1953	1679.02	256.949	Interpolated
1954	1715.92	261.451	Interpolated
1955	1753.63	266.051	Interpolated
1956	1777.98	269.022	Interpolated
1957	1831.56	275.558	Interpolated
1958	1871.82	280.468	Interpolated
1959	1912.95	285.486	Interpolated
1960	1955	290.615	Interpolated
1961	1983.92	294.143	Interpolated
1962	2026.39	299.324	Interpolated
1963	2063.07	303.798	Interpolated
1964	2100.41	308.354	Interpolated
1965	2138.43	312.992	Interpolated
1966	2171.29	317	Interpolated
1967	2216.57	322.524	Interpolated
1968	2256.71	327.421	Interpolated
1969	2297.58	332.406	Interpolated
1970	2339.19	337.483	Interpolated
1971	2411.97	346.361	Interpolated
1972	2494.83	356.469	Interpolated
1973	2580.64	366.937	Interpolated
1974	2669.52	377.779	Interpolated
1975	2664.49	377.165	Interpolated
1976	2656.37	376.175	Interpolated
1977	2750.1	387.61	Interpolated
1978	2771.53	390.223	CLUES
1979	2792.96	392.837	Interpolated
1980	2814.38	395.451	Interpolated
1981	2835.81	398.065	Interpolated
1982	2856.05	400.533	Interpolated
1983	2876.28	403.002	Interpolated
1984	2896.52	405.47	Interpolated
1985	2916.75	407.939	Interpolated
1986	2936.99	410.407	Interpolated
1987	2957.47	412.905	Interpolated
1988	2977.94	415.403	Interpolated
1989	2998.42	417.901	Interpolated
1990	3018.9	420.4	Interpolated
1991	3039.38	422.898	Interpolated
1992	3058.06	425.177	Interpolated
1993	3076.75	427.457	Interpolated
1994	3095.44	429.736	Interpolated
1995	3114.12	432.015	Interpolated
1996	3132.81	434.295	Interpolated
1997	3150.96	436.51	Interpolated
1998	3169.12	438.724	Interpolated
1999	3187.27	440.939	Interpolated
2000	3205.43	443.154	CLUES
2001	3163.83	438.08	Interpolated
2002	3128.75	433.8	CLUES
2003	3404.94	467.492	Interpolated
2004	3402.94	467.248	Interpolated
2005	3420.1	469.342	Interpolated
2006	3547.8	484.919	Interpolated
2007	3715.48	505.375	Interpolated
2008	4089.19	550.963	CLUES
2009	4369.96	585.214	Interpolated
2010	4551.6	607.372	Interpolated
2011	4757.68	632.511	Interpolated
2012	5483.52	721.055	CLUES
2013	4770.57	634.083	Interpolated
2014	5263.62	694.231	Interpolated
2015	5715.77	749.387	Interpolated
2016	5293.17	697.834	Interpolated
2017	5407.81	711.82	Interpolated
2018	5342.92	703.904	Interpolated
2019	5358.48	705.802	Interpolated
2020	5144.13	679.654	CLUES

## Sheet: BBN outputs
Core	Year	E[PotN]	E[Macroalgae]	std-dev Macroalgae	E[SedDep]	E[Mud]	E[aRPD]	std-dev aRPD	E[SedTOC]	E[Seagrass_std]	std-dev Seagrass_std	E[Macrobenthos]	std-dev Macrobenthos	E[ETI]	std-dev ETI
Central	2019	705.802	0.213819	0.130243	30.8	100	0.497523	0.725367	3.1	0.859312	0.118064	5.50662	1.02194	0.862294	0.0724326
Central	2017	711.82	0.213776	0.130201	30.8		0.497523	0.725367	2.5	0.859314	0.118061	5.50478	1.02312	0.862289	0.0724148
Central	2016	697.834	0.294941	0.17994	30.8		0.497766	0.725628	2.6	0.855318	0.122816	5.26378	1.1539	0.823211	0.0988179
Central	2013	634.083	0.295164	0.180007	30.8	100	0.497766	0.725628	2.5	0.855307	0.122829	5.2647	1.15348	0.823125	0.0988626
Central	2011	632.511	0.294941	0.17994	30.8		0.497766	0.725628	2.5	0.855318	0.122816	5.26378	1.1539	0.823211	0.0988179
Central	2010	607.372	0.294941	0.17994	30.8		0.497766	0.725628	2.5	0.855318	0.122816	5.26378	1.1539	0.823211	0.0988179
Central	2008	550.963	0.406289	0.19829	30.8		0.499076	0.726894	2.2	0.850008	0.128179	4.91672	1.27676	0.766178	0.116439
Central	2006	484.919	0.536706	0.17649	30.8	100	0.502739	0.73037	2.1	0.844184	0.132596	4.48119	1.35635	0.692428	0.118936
Central	1998	438.724	0.536706	0.17649	3.8	100	0.502739	0.73037	2	0.523428	0.223947	4.48119	1.35635	0.650154	0.134665
Central	1993	427.457	0.593141	0.137548	3.8	100	1.34821	1.17567	1.9	0.477888	0.210758	4.31978	1.33788	0.563547	0.128292
Central	1985	407.939	0.593141	0.137548	3.8	100	1.34821	1.17567	1.3	0.477888	0.210758	4.31978	1.33788	0.563547	0.128292
Central	1980	395.451	0.683419	0.14579	3.8	100	1.6183	1.24027	1.8	0.399138	0.202255	4.0633	1.36688	0.486236	0.134891
Central	1966	317	0.683419	0.14579	3.8	61.12	1.6183	1.24027	1.6	0.399138	0.202255	4.0633	1.36688	0.486236	0.134891
Central	1953	256.949	0.780242	0.136487	3.8	100	1.92397	1.27327	1.3	0.317391	0.191957	3.90197	1.36325	0.404723	0.125487
Central	1943	245.785	0.776133	0.131448	3.8	29.58	3.27837	1.23142	0.7	0.320334	0.187439	2.36934	0.854439	0.319465	0.121337
Central	1929	224.951	0.79142	0.132347	3.8	100	2.53371	1.6816		0.308008	0.189424	3.07812	1.3603	0.354948	0.152912
Central	1927	222.229	0.805793	0.126173	3.8		3.37683	1.21202	0.7	0.296091	0.186501	2.32042	0.843137	0.294423	0.116247
Central	1916	210.517	0.776133	0.131448	3.8	33.32	3.27837	1.23142	0.6	0.320334	0.187439	2.36934	0.854439	0.319465	0.121337
Central	1900	201.281	0.842323	0.112105	3.8		4.32677	0.870308	0.4	0.266424	0.183272	2.21824	0.85966	0.215834	0.0992224
Central	1874	187.516	0.8748	0.0889612	3.8		4.39629	0.819495	0.2	0.24021	0.178147	2.21915	0.837227	0.190965	0.0832054
Upper	2019	705.802	0.213819	0.130243	16.7	87.84	0.497523	0.725367	2.95	0.859312	0.118064	5.50662	1.02194	0.862294	0.0724326
Upper	2016	697.834	0.295164	0.180007	16.7	100	0.497766	0.725628	2.8	0.855307	0.122829	5.2647	1.15348	0.823125	0.0988626
Upper	2013	634.083	0.295164	0.180007	16.7	100	0.497766	0.725628	2.77	0.855307	0.122829	5.2647	1.15348	0.823125	0.0988626
Upper	2009	585.214	0.47548	0.185419	16.7	100	1.11506	1.28361		0.846822	0.131038	4.56903	1.42028	0.690924	0.145304
Upper	2007	505.375	0.406568	0.198239	16.7	100	0.499078	0.726897	2.39	0.849995	0.128192	4.91696	1.27662	0.766054	0.11644
Upper	2004	467.248	0.536706	0.17649	16.7	100	0.502739	0.73037	2.25	0.844184	0.132596	4.48119	1.35635	0.692428	0.118936
Upper	2001	438.08	0.536706	0.17649	16.7		0.502739	0.73037	2.13	0.844184	0.132596	4.48119	1.35635	0.692428	0.118936
Upper	1998	438.724	0.536706	0.17649	16.7		0.502739	0.73037	2.13	0.844184	0.132596	4.48119	1.35635	0.692428	0.118936
Upper	1995	432.015	0.593141	0.137548	16.7		1.34821	1.17567	1.89	0.841883	0.134426	4.31978	1.33788	0.608008	0.116727
Upper	1989	417.901	0.593141	0.137548	16.7		1.34821	1.17567	1.54	0.841883	0.134426	4.31978	1.33788	0.608008	0.116727
Upper	1983	403.002	0.592362	0.138075	16.7		1.34635	1.1753	1.49	0.841914	0.134409	4.31131	1.34271	0.60832	0.116828
Upper	1966	317	0.69815	0.148148	2.2	43.28	1.9869	1.64054		0.386119	0.200336	3.44707	1.47324	0.450337	0.165119
Upper	1934	230.641	0.805793	0.126173	2.2		3.37683	1.21202	0.84	0.296091	0.186501	2.32042	0.843137	0.294423	0.116247
Upper	1925	219.561	0.79142	0.132347	2.2	13.43	3.78169	1.23782		0.308008	0.189424	1.90714	1.01792	0.272424	0.127041
Upper	1892	196.767	0.854376	0.104372	2.2		3.53743	1.16593	0.77	0.256644	0.18121	2.27804	0.765673	0.254144	0.0981075
Upper	1880	190.474	0.84662	0.109617	2.2	7.61	4.1964	0.991625		0.262945	0.182658	1.47891	1.06911	0.206342	0.10326
Upper	1847	172.765	0.8748	0.0889612	2.2		4.39629	0.819495	0.32	0.24021	0.178147	2.21915	0.837227	0.190965	0.0832054
